# Supplementary material
Source: publisher site journal article supplement (https://oneecosystem.pensoft.net/article/download/suppl/5238136/)
Supplement: Supplementary file 1

## Detailed description of the spatial data used to map ES

The map of the forest cover was derived from the ecotope (i.e. small polygon with largely homogeneous ecological functions) map (version 2.7) of the LifeWatch project. The ecotope map was built from Walloon orthophotographs from 2015 (2 m resolution) by an automatic segmentation of homogeneous patches of land cover and topography combined with environmental data (e.g. soil, climate, and hydrology). Each ecotope (average size of 1.3 ha) is characterized by abiotic variables and the percentage of each land cover. The dominant land cover of each ecotope is determined from the percentage of each land cover based on the ESA (European Space Agency) land cover CCI (Climate Change Initiative) legend. This legend distinguishes 18 land cover classes from urban areas to broadleaved forests. The ecotope database can be downloaded for free from the LifeWatch website (<http://www.lifewatch.be>). (Radoux et al. 2019)

Only the forest land cover classes were considered to map the forest cover. They were regrouped to distinguish broadleaved forests from coniferous forests, as follows:

1. broadleaved forests: one class of broadleaved forests and three classes of mixed forests with a majority of broadleaved trees and
2. coniferous forests: one class of coniferous forests and three classes of mixed forests with a majority of coniferous trees.

The broadleaved forests were considered to be uneven-aged forests because it is their dominant management in the Ardenne while the coniferous forests are dominated by spruce in pure even-aged stands.

The ecological context was mapped based on the sensitivity soil map (version 2, 10 m resolution, 2015). Sensitive soils are defined as soils with low productivity or with a high ecological significance. The sensitivity soil map was produced from the Digital Soil Map of Wallonia (DSMW) (1/20,000; 2008), the Digital Elevation Model (10 m resolution; 2005) from the ERRUISSOL project and the flood hazard map (1/25,000; 2013), all of which are downloadable from the Walloon Geoportal (<http://geoportail.wallonie.be>). An order of priority was established because the sensitivity of a soil can be explained by several factors. A sensitive soil was first defined based on the presence of peat, then on the alluvial nature, afterwards on the soil moisture, its depth, the presence of podzol or sand, the flood hazard and finally, the slope. For example, if the soil is both alluvial and superficial, it was assigned to alluvial soil. This map distinguishes 36 sensitivity soil classes from non-sensitive soils to peat soils. They were clustered into six types, relevant to characterize the supply of the six ES (Jacquemin 2015) (Table 1).

**Table 1.** The 36 sensitivity soil classes sorted according to their order of priority and with their corresponding ecological context. Adapted from Jacquemin, 2015.

| Soil type                               | Ecological context |
|-----------------------------------------|--------------------|
| Peaty soil                              | Peat soil          |
| Peat soil                               | Peat soil          |
| Spring area                             | Alluvial soil      |
| Gravel soil at the bottom of the valley | Alluvial soil      |
| Loam soil at the bottom of the valley   | Alluvial soil      |
| Very wet alluvial soil                  | Alluvial soil      |

|                                            |                     |
|--------------------------------------------|---------------------|
| Wet alluvial soil                          | Alluvial soil       |
| Moderately wet alluvial soil               | Alluvial soil       |
| Dry alluvial soil                          | Alluvial soil       |
| Very wet non-alluvial soil                 | Wet soil            |
| Wet non-alluvial soil                      | Wet soil            |
| Bedrock                                    | Surface soil        |
| Very surface soil (<20 cm)                 | Surface soil        |
| Surface soil (<40 cm)                      | Surface soil        |
| Podzolic soil                              | Podzolic soil       |
| Degraded or newly developing podzolic soil | Podzolic soil       |
| Sandy soil                                 | Podzolic soil       |
| Artificial soil                            | Artificial soil     |
| Non-classified soil                        | Non-classified soil |
| Low flooding hazard                        | Alluvial soil       |
| Moderate flooding hazard                   | Alluvial soil       |
| High flooding hazard                       | Alluvial soil       |
| Slope 15-20° cold exposure                 | Steep slope         |
| Slope 20-30° cold exposure                 | Steep slope         |
| Slope > 30° cold exposure                  | Steep slope         |
| Slope 15-20° hot exposure                  | Steep slope         |
| Slope 20-30° hot exposure                  | Steep slope         |
| Slope > 30° hot exposure                   | Steep slope         |
| Unmapped soil slope 15-20° cold exposure   | Steep slope         |
| Unmapped soil slope 20-30° cold exposure   | Steep slope         |
| Unmapped soil slope > 30° cold exposure    | Steep slope         |
| Unmapped soil slope 15-20° hot exposure    | Steep slope         |
| Unmapped soil slope 20-30° hot exposure    | Steep slope         |
| Unmapped soil > 30° hot exposure           | Steep slope         |
| Non-sensitive dry soil                     | Non-sensitive soil  |
| Non-sensitive wet soil                     | Non-sensitive soil  |
| Non-sensitive soil                         | Non-sensitive soil  |

The surface soil, scarcely represented on less than 1% of the area of the case study and artificial and non-classified soils were not included in the matrix.
